# Supplementary material for: Cholesterol modulates type I/II TGF-β receptor complexes and alters the balance between Smad and Akt signaling in hepatocytes
Source: PubMed Central journal article supplement (PMC10761706; doi:10.1038/s42003-023-05654-9), 2024-01-02
Supplement: 42003_2023_5654_MOESM2_ESM.pdf [file 42003_2023_5654_MOESM2_ESM.pdf]

## **Description of Additional Supplementary Files**

**File name:** Supplementary Data

**Description:** The source data behind all graphs in the manuscript.
